# Supplementary material
Source: ML conference proceedings conference paper supplement (https://openaccess.thecvf.com/content/ICCV2021/html/Venkatesh_Deep_Implicit_Surface_ICCV_2021_paper.html)
Supplement: Supplementary file 1 [file Venkatesh_Deep_Implicit_Surface_ICCV_2021_supplemental.zip]

Archive with 2 entries (2 files):
- 09228-supp.pdf
- __MACOSX/._09228-supp.pdf
